# Supplementary material for: Studying the Physical and Chemical Properties of Polydimethylsiloxane Matrix Reinforced by Nanostructured TiO2 Supported on Mesoporous Silica
Source: MDPI journal article supplement (doi:10.3390/polym15010081), 2022-12-25
Supplement: s1 [file s1]

## Supplementary Materials

# **Studying the Physical and Chemical Properties of Polydimethylsiloxane Matrix Reinforced by Nanostructured TiO<sub>2</sub> Supported on Mesoporous Silica**

**Sari Katz <sup>1,\*</sup>, Noa Lachman <sup>2</sup>, Nir Hafif <sup>3</sup>, Lilach Rosh <sup>3</sup>, Alexander Pevzner <sup>3</sup>, Amir Lybman <sup>3</sup>, Tal Amitay-Rosen <sup>3</sup>, Ido Nir <sup>3</sup> and Hadar Rotter <sup>3,\*</sup>**

<sup>1</sup> Department of Space Environment, Soreq NRC, Yavne 81800, Israel

<sup>2</sup> Department of Materials Science and Engineering, Tel Aviv University, Tel Aviv 6997801, Israel

<sup>3</sup> Department of Physical Chemistry, Israel Institute for Biological Research, Ness Ziona 74100, Israel

\* Correspondence: sarik@soreq.gov.il (S.K.); hadarr@iibr.gov.il (H.R.)

### SEM/EDS images of TiO<sub>2</sub>/MCM/PDMS composites at various TiO<sub>2</sub>/MCM wt% and elements mapping

SEM/EDS images of the TiO<sub>2</sub>/MCM/PDMS composites at various TiO<sub>2</sub>/MCM wt% and C, Si, O, Ti elements mapping (Figure S1) show that the TiO<sub>2</sub>/MCM particles were dispersed uniformly in the PDMS matrix. As the loading increased above 10 wt% bigger aggregates at higher concentration were formed.

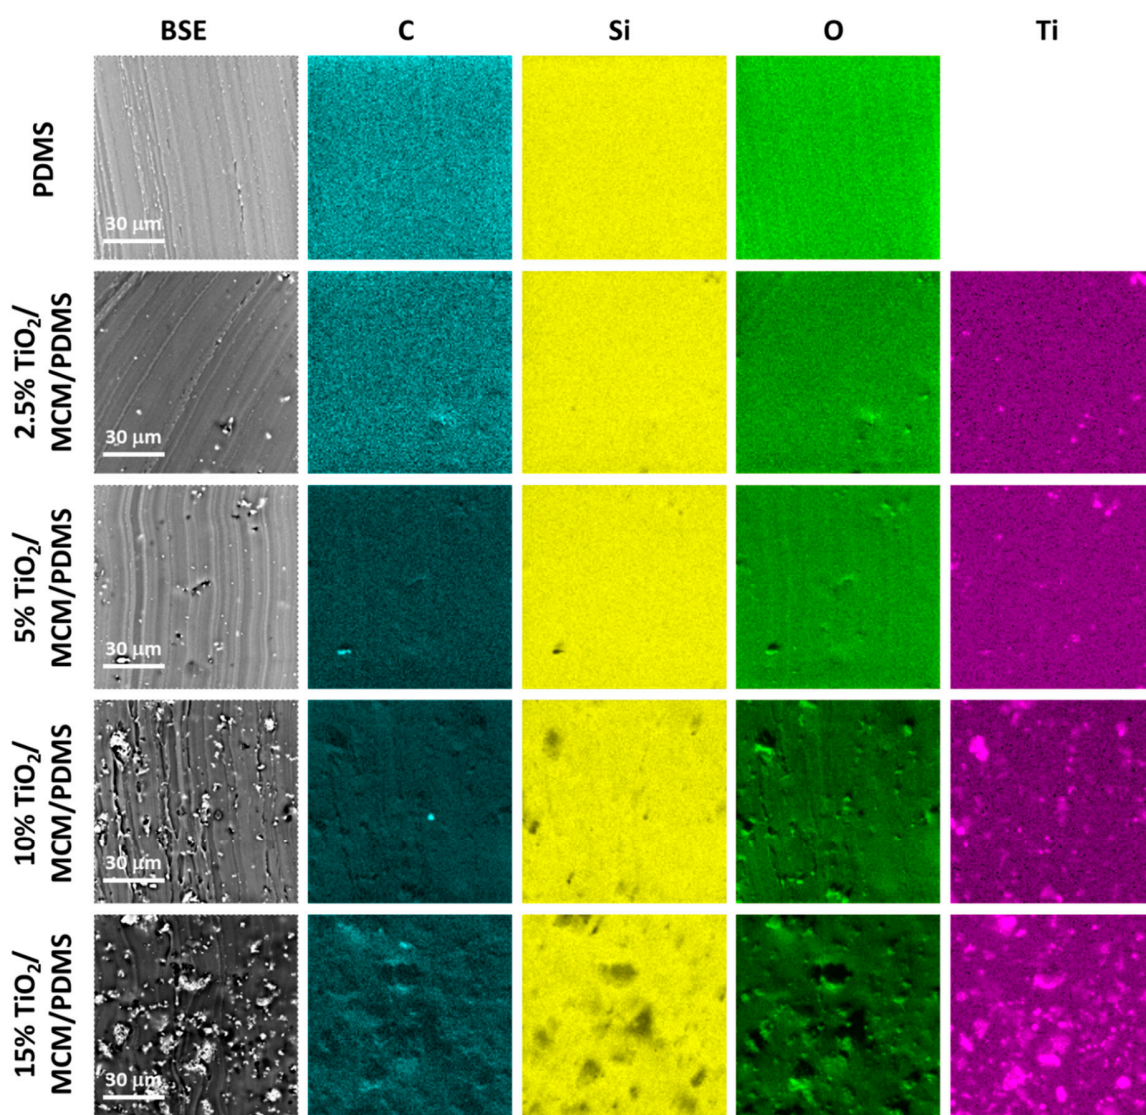

**Figure S1.** Back scattered electrons (BSE) images of cross-sectional TiO<sub>2</sub>/MCM/PDMS composites (left column) and elements mapping by EDS at various adsorbent wt%.
